# Supplementary material for: Sirtuin 6 inhibition protects against glucocorticoid-induced skeletal muscle atrophy by regulating IGF/PI3K/AKT signaling
Source: PubMed Central journal article supplement (PMC9478160; doi:10.1038/s41467-022-32905-w), 2022-09-15
Supplement: 41467_2022_32905_MOESM2_ESM.pdf [file 41467_2022_32905_MOESM2_ESM.pdf]

## Reporting Summary

Nature Portfolio wishes to improve the reproducibility of the work that we publish. This form provides structure for consistency and transparency in reporting. For further information on Nature Portfolio policies, see our [Editorial Policies](#) and the [Editorial Policy Checklist](#).

### Statistics

For all statistical analyses, confirm that the following items are present in the figure legend, table legend, main text, or Methods section.

- |                                     |                                                                                                                                                                                                                                                                                                |
|-------------------------------------|------------------------------------------------------------------------------------------------------------------------------------------------------------------------------------------------------------------------------------------------------------------------------------------------|
| n/a                                 | Confirmed                                                                                                                                                                                                                                                                                      |
| <input type="checkbox"/>            | <input checked="" type="checkbox"/> The exact sample size ( $n$ ) for each experimental group/condition, given as a discrete number and unit of measurement                                                                                                                                    |
| <input checked="" type="checkbox"/> | <input type="checkbox"/> A statement on whether measurements were taken from distinct samples or whether the same sample was measured repeatedly                                                                                                                                               |
| <input type="checkbox"/>            | <input checked="" type="checkbox"/> The statistical test(s) used AND whether they are one- or two-sided<br><i>Only common tests should be described solely by name; describe more complex techniques in the Methods section.</i>                                                               |
| <input checked="" type="checkbox"/> | <input type="checkbox"/> A description of all covariates tested                                                                                                                                                                                                                                |
| <input checked="" type="checkbox"/> | <input type="checkbox"/> A description of any assumptions or corrections, such as tests of normality and adjustment for multiple comparisons                                                                                                                                                   |
| <input type="checkbox"/>            | <input checked="" type="checkbox"/> A full description of the statistical parameters including central tendency (e.g. means) or other basic estimates (e.g. regression coefficient) AND variation (e.g. standard deviation) or associated estimates of uncertainty (e.g. confidence intervals) |
| <input type="checkbox"/>            | <input checked="" type="checkbox"/> For null hypothesis testing, the test statistic (e.g. $F$ , $t$ , $r$ ) with confidence intervals, effect sizes, degrees of freedom and $P$ value noted<br><i>Give <math>P</math> values as exact values whenever suitable.</i>                            |
| <input checked="" type="checkbox"/> | <input type="checkbox"/> For Bayesian analysis, information on the choice of priors and Markov chain Monte Carlo settings                                                                                                                                                                      |
| <input checked="" type="checkbox"/> | <input type="checkbox"/> For hierarchical and complex designs, identification of the appropriate level for tests and full reporting of outcomes                                                                                                                                                |
| <input checked="" type="checkbox"/> | <input type="checkbox"/> Estimates of effect sizes (e.g. Cohen's $d$ , Pearson's $r$ ), indicating how they were calculated                                                                                                                                                                    |

*Our web collection on [statistics for biologists](#) contains articles on many of the points above.*

### Software and code

Policy information about [availability of computer code](#)

Data collection Confocal images were processed using Zen 2.1 Black software and quantification was done using ImageJ version 1.53c software. ImageJ version 1.53c software was used for quantification of myotube diameter, cross-sectional area of muscle fibers, mean fluorescence intensity and nuclear localization of FoxO and densitometric analysis of western blots.

Data analysis Data analysis and graph preparation were performed using Graph-pad prism (Version 6.04).

For manuscripts utilizing custom algorithms or software that are central to the research but not yet described in published literature, software must be made available to editors and reviewers. We strongly encourage code deposition in a community repository (e.g. GitHub). See the Nature Portfolio [guidelines for submitting code & software](#) for further information.

### Data

Policy information about [availability of data](#)

All manuscripts must include a [data availability statement](#). This statement should provide the following information, where applicable:

- Accession codes, unique identifiers, or web links for publicly available datasets
- A description of any restrictions on data availability
- For clinical datasets or third party data, please ensure that the statement adheres to our [policy](#)

Source data supporting the findings in this study underlying dot plots, bar graphs, and uncropped western blots are provided in the online source data file. Source data are provided with this paper. We have neither used any publicly available datasets nor deposited dataset in any repository for this study.

## Field-specific reporting

Please select the one below that is the best fit for your research. If you are not sure, read the appropriate sections before making your selection.

Life sciences  Behavioural & social sciences  Ecological, evolutionary & environmental sciences

For a reference copy of the document with all sections, see [nature.com/documents/nr-reporting-summary-flat.pdf](https://www.nature.com/documents/nr-reporting-summary-flat.pdf)

## Life sciences study design

All studies must disclose on these points even when the disclosure is negative.

|                 |                                                                                                                                                                                                                                                                                                                                                                                                 |
|-----------------|-------------------------------------------------------------------------------------------------------------------------------------------------------------------------------------------------------------------------------------------------------------------------------------------------------------------------------------------------------------------------------------------------|
| Sample size     | No sample size calculation was performed using any statistical method. Sufficient sample size for in vitro and in vivo studies was determined based on previous lab experiences and research articles in the field (PMID: 33227539, 15125842, 31320633, 25834726) allowing to draw a robust conclusion.                                                                                         |
| Data exclusions | No data is excluded from analysis.                                                                                                                                                                                                                                                                                                                                                              |
| Replication     | All attempts were made to generate reproducible data. We even cross verified the validity of data independently by two mice models from two independent labs. We have counted a large number of myotubes in the in vitro experiments to test the reproducibility and robustness of data which were repeated three or more independent times. We strongly believe our data will be reproducible. |
| Randomization   | All the samples were randomized.                                                                                                                                                                                                                                                                                                                                                                |
| Blinding        | Blinding was not relevant to planning of the experiments since we used mice models that required genotype assessment and subsequent experimentation. The investigators were blinded to group allocation while collecting and analysing the data.                                                                                                                                                |

## Reporting for specific materials, systems and methods

We require information from authors about some types of materials, experimental systems and methods used in many studies. Here, indicate whether each material, system or method listed is relevant to your study. If you are not sure if a list item applies to your research, read the appropriate section before selecting a response.

### Materials & experimental systems

| n/a                                 | Involved in the study                                           |
|-------------------------------------|-----------------------------------------------------------------|
| <input type="checkbox"/>            | <input checked="" type="checkbox"/> Antibodies                  |
| <input type="checkbox"/>            | <input checked="" type="checkbox"/> Eukaryotic cell lines       |
| <input checked="" type="checkbox"/> | <input type="checkbox"/> Palaeontology and archaeology          |
| <input type="checkbox"/>            | <input checked="" type="checkbox"/> Animals and other organisms |
| <input checked="" type="checkbox"/> | <input type="checkbox"/> Human research participants            |
| <input checked="" type="checkbox"/> | <input type="checkbox"/> Clinical data                          |
| <input checked="" type="checkbox"/> | <input type="checkbox"/> Dual use research of concern           |

### Methods

| n/a                                 | Involved in the study                           |
|-------------------------------------|-------------------------------------------------|
| <input checked="" type="checkbox"/> | <input type="checkbox"/> ChIP-seq               |
| <input checked="" type="checkbox"/> | <input type="checkbox"/> Flow cytometry         |
| <input checked="" type="checkbox"/> | <input type="checkbox"/> MRI-based neuroimaging |

## Antibodies

Antibodies used

Details for antibodies used in western blotting (WB), immunofluorescence (IF), immunohistochemistry (IHC) are provided provided in the supplementary file and also below:

WB: Puromycin (1:500) Developmental Studies Hybridoma Bank, clone 4A12, PMY-2A4

WB: SIRT6 (1:1000) Cell Signaling, clone D8D12, 12486

WB: p-AKT S (1:1000) Cell Signaling, clone D9E, 4060

WB: p-AKT T (1:1000) Cell Signaling, clone D25E6, 13038

WB: AKT (1:1000) Cell Signaling, clone C67E7, 4691

WB: p-FoxO1 (1:1000) Cell Signaling, 9461

WB: p-FoxO3 (1:1000) Cell Signaling, clone D18H8, 13129

WB: p-mTOR (1:1000) Cell Signaling, clone D9C2, 5536

WB: p-AMPK (1:500) Cell Signaling, clone 40H9, 2535

WB: p-ACC (1:1000) Cell Signaling, clone D7D11, 11818

WB mTOR (1:1000) Cell Signaling, clone 7C10, 2983

WB: AMPK (1:1000) Cell Signaling, 2532

WB: ACC (1:1000) Cell Signaling, clone C83B10, 3676

WB: Acetyl-Histone H3 (Lys9) (1:1000) Cell Signaling, clone C5B11, 9649

WB: Acetyl-Histone H3 (Lys18) (1:1000) Cell Signaling, 9675

WB: Histone H3 (1:1000) Cell Signaling, 9715

WB: Anti-SOD2/MnSOD (acetyl K68) (1:1000) Abcam, clone EPVANR2, ab137037

WB: Anti-SOD2/MnSOD (1:1000) Abcam, ab13533  
 WB: SIRT1 (1:500) Cloud-Clone, PAE912Mu01  
 WB: SIRT2 (1:1000) Sigma-Aldrich, S8447  
 WB: SIRT3 (1:1000) Cell Signaling, clone D22A3, 5490  
 WB: SIRT4 (1:500) Cloud-Clone, PAE914Mu01  
 WB: SIRT5 (1:1000) Cell Signaling, clone D8C3, 8782  
 WB: SIRT7 (1:500) Cloud-Clone, PAE917Hu01  
 WB: c-Jun (1:500) Santa Cruz, sc-1694  
 WB: GAPDH (1:1000) Santa Cruz, sc-25778  
 WB: Actin (1:5000) Sigma-Aldrich, clone AC-15, A3854  
 WB: Vinculin (1:1000) Cell Signaling, clone E1E9V, 13901  
 WB: FoxO1 (1:1000) Cell Signaling, clone C29H4, 2880  
 WB: FoxO3 (1:1000) Cell Signaling, clone D19A7, 12829  
 WB: Anti-Rabbit HRP (1:5000) Cell Signaling, 7074  
 WB: Anti-Mouse HRP (1:5000) Cell Signaling, 7076  
 WB: Clean-Blot IP Detection Reagent (1:2000) Thermo Fisher Scientific, 21230  
 WB: anti-Rabbit IgG light chain HRP (1:1000) Cell Signaling, clone D3V2A, 58802  
 IF: Myomesin (1:50) Developmental Studies Hybridoma Bank, clone mMaC myomesin, B4 mMaC myomesin B4  
 IF: Atrogin-1 (1:100) Abcam, ab74023  
 IF: MuRF-1/2/3 (1:100) Abcam, clone EPR6431(2), Ab172479  
 IF: FoxO1 (1:200) Cell Signaling, clone C29H4, 2880  
 IF: FoxO3 (1:200) Cell Signaling, clone D19A7, 12829  
 IF: Donkey anti-Mouse IgG (H+L), Alexa Fluor 488 (1:400) Thermo Fisher Scientific, A-21202  
 IF: Donkey anti-Rabbit IgG (H+L), DyLight 594 (1:400) Thermo Fisher Scientific, SA5-10040  
 IF: Goat anti-Rabbit IgG (H+L), Alexa Fluor 546 (1:400) Thermo Fisher Scientific, A-11035  
 IF: Goat anti-Mouse IgG (H+L), Alexa Fluor 488 (1:400) Thermo Fisher Scientific, A-11001  
 IHC: Myosin heavy chain Type I (1:5) Developmental Studies Hybridoma Bank, clone BA-D5, BA-D5  
 IHC: Myosin heavy chain Type IIA (1:5) Developmental Studies Hybridoma Bank, clone SC-71, SC-71  
 IHC: Myosin heavy chain Type IIB (1:5) Developmental Studies Hybridoma Bank, clone BF-F3, BF F3  
 IHC: Myosin heavy chain Type IIX IHC (1:5) Developmental Studies Hybridoma Bank, clone 6H1, 6H1  
 IHC: Goat anti-Mouse IgG1, Alexa Fluor 594 (1:5) Thermo Fisher Scientific, A-21125  
 IHC: Goat anti-Mouse IgM (Heavy chain), Alexa Fluor 488 (1:5) Thermo Fisher Scientific, A-21042

## Validation

SIRT6 antibody was validated using KO cell lines. All the other antibodies used in the study were commercial available and specificity was validated by manufacturers. Below are the details of the same.

Puromycin, <https://dshb.biology.uiowa.edu/PMY-2A4>

SIRT6, <https://www.cellsignal.com/products/primary-antibodies/sirt6-d8d12-rabbit-mab/12486>

p-AKT S, <https://www.cellsignal.com/products/primary-antibodies/phospho-akt-ser473-d9e-xp-rabbit-mab/4060>

p-AKT T, <https://www.cellsignal.com/products/primary-antibodies/phospho-akt-thr308-d25e6-xp-rabbit-mab/13038>

AKT, <https://www.cellsignal.com/products/primary-antibodies/akt-pan-c67e7-rabbit-mab/4691>

p-FoxO1, <https://www.cellsignal.com/products/primary-antibodies/phospho-foxo1-ser256-antibody/9461>

p-FoxO3, <https://www.cellsignal.com/products/primary-antibodies/phospho-foxo3a-ser253-d18h8-rabbit-mab/13129>

p-mTOR, <https://www.cellsignal.com/products/primary-antibodies/phospho-mtor-ser2448-d9c2-xp-rabbit-mab/5536>

p-AMPK, <https://www.cellsignal.com/products/primary-antibodies/phospho-ampka-thr172-40h9-rabbit-mab/2535>

p-ACC, <https://www.cellsignal.com/products/primary-antibodies/phospho-acetyl-coa-carboxylase-ser79-d7d11-rabbit-mab/11818>

mTOR, <https://www.cellsignal.com/products/primary-antibodies/mtor-7c10-rabbit-mab/2983>

AMPK, <https://www.cellsignal.com/products/primary-antibodies/ampka-antibody/2532>

ACC, <https://www.cellsignal.com/products/primary-antibodies/acetyl-coa-carboxylase-c83b10-rabbit-mab/3676>

Acetyl-Histone H3 (Lys9), <https://www.cellsignal.com/products/primary-antibodies/acetyl-histone-h3-lys9-c5b11-rabbit-mab/9649>

Acetyl-Histone H3 (Lys18), <https://www.cellsignal.com/products/primary-antibodies/acetyl-histone-h3-lys18-antibody/9675>

Histone H3, <https://www.cellsignal.com/products/primary-antibodies/histone-h3-antibody/9715>

SOD2/MnSOD (acetyl K68), <https://www.abcam.com/sod2mnsod-acetyl-k68-antibody-epvanr2-ab137037.html>

SOD2/MnSOD, <https://www.abcam.com/sod2mnsod-antibody-ab13533.html>

SIRT1, <http://www.cloud-clone.com/products/PAE912Mu01.html>

SIRT2, <https://www.sigmaaldrich.com/DK/en/product/sigma/s8447>

SIRT3, <https://www.cellsignal.com/products/primary-antibodies/sirt3-d22a3-rabbit-mab/5490>

SIRT4, <http://www.cloud-clone.com/products/PAE914Hu01.html>

SIRT5, <https://www.cellsignal.com/products/primary-antibodies/sirt5-d8c3-rabbit-mab/8782>

SIRT7, <http://cloud-clone.com/products/PAE917Hu01.html>

c-Jun, <https://www.scbt.com/p/c-jun-antibody-h-79>

GAPDH, <https://www.scbt.com/p/gapdh-antibody-fl-335>  
 Actin, <https://www.sigmaaldrich.com/DK/en/product/sigma/a3854>  
 Vinculin, <https://www.cellsignal.com/products/primary-antibodies/vinculin-e1e9v-xp-rabbit-mab/13901>  
 FoxO1, <https://www.cellsignal.com/products/primary-antibodies/foxo1-c29h4-rabbit-mab/2880>  
 FoxO3, <https://www.cellsignal.com/products/primary-antibodies/foxo3a-d19a7-rabbit-mab/12829>  
 Anti-Rabbit HRP, <https://www.cellsignal.com/products/secondary-antibodies/anti-rabbit-igg-hrp-linked-antibody/7074>  
 Anti-Mouse HRP, <https://www.cellsignal.com/products/secondary-antibodies/anti-mouse-igg-hrp-linked-antibody/7076>  
 Clean-Blot IP Detection Reagent, <https://www.thermofisher.com/order/catalog/product/21230>  
 anti-Rabbit IgG light chain HRP, <https://www.cellsignal.com/products/secondary-antibodies/rabbit-anti-mouse-igg-light-chain-specific-d3v2a-mab-hrp-conjugate/58802>  
 Myomesin, <https://dshb.biology.uiowa.edu/mMaC-myomesin-B4>  
 Atrogin-1, <https://www.abcam.com/abx32-antibody-ab74023.html>  
 MuRF-1/2/3, <https://www.abcam.com/murf1--murf3--murf2-antibody-epr64312-ab172479.html>  
 Donkey anti-Mouse IgG (H+L), Alexa Fluor 488, Donkey anti-Mouse IgG (H+L), Alexa Fluor 488  
 Donkey anti-Rabbit IgG (H+L), DyLight 594, <https://www.thermofisher.com/antibody/product/Donkey-anti-Rabbit-IgG-H-L-Cross-Adsorbed-Secondary-Antibody-Polyclonal/SA5-10040>  
 Goat anti-Rabbit IgG (H+L), Alexa Fluor 546, <https://www.thermofisher.com/antibody/product/Goat-anti-Rabbit-IgG-H-L-Highly-Cross-Adsorbed-Secondary-Antibody-Polyclonal/A-11035>  
 Goat anti-Mouse IgG (H+L), Alexa Fluor 488, <https://www.thermofisher.com/antibody/product/Goat-anti-Mouse-IgG-H-L-Cross-Adsorbed-Secondary-Antibody-Polyclonal/A-11001>  
 Myosin heavy chain Type I, <https://dshb.biology.uiowa.edu/BA-D5>  
 Myosin heavy chain Type IIA, <https://dshb.biology.uiowa.edu/SC-71>  
 Myosin heavy chain Type IIB, <https://dshb.biology.uiowa.edu/BF-F3>  
 Myosin heavy chain Type IIX IHC, <https://dshb.biology.uiowa.edu/6H1>  
 Goat anti-Mouse IgG1, Alexa Fluor 594, <https://www.thermofisher.com/antibody/product/Goat-anti-Mouse-IgG1-Cross-Adsorbed-Secondary-Antibody-Polyclonal/A-21125>  
 Goat anti-Mouse IgM (Heavy chain), Alexa Fluor 488, <https://www.thermofisher.com/antibody/product/Goat-anti-Mouse-IgM-Heavy-chain-Cross-Adsorbed-Secondary-Antibody-Polyclonal/A-21042>

## Eukaryotic cell lines

Policy information about [cell lines](#)

|                                                                   |                                                                                                  |
|-------------------------------------------------------------------|--------------------------------------------------------------------------------------------------|
| Cell line source(s)                                               | C2C12 (CRL-1722) and 293T (CRL-3216) were procured from ATCC.                                    |
| Authentication                                                    | Commercial sources. Validation done by the supplier and we have not validated in our laboratory. |
| Mycoplasma contamination                                          | All cell lines were tested negative for mycoplasma contamination.                                |
| Commonly misidentified lines (See <a href="#">ICLAC</a> register) | No commonly misidentified cell line were used in the study.                                      |

## Animals and other organisms

Policy information about [studies involving animals](#); [ARRIVE guidelines](#) recommended for reporting animal research

|                         |                                                                                                                                                                                                                                                                                                                                                                                                                                                                                                                                                       |
|-------------------------|-------------------------------------------------------------------------------------------------------------------------------------------------------------------------------------------------------------------------------------------------------------------------------------------------------------------------------------------------------------------------------------------------------------------------------------------------------------------------------------------------------------------------------------------------------|
| Laboratory animals      | C57BL/6, SIRT6 <sup>fl/fl</sup> (Sirt6 <sup>tm1.1Cxd/J</sup> ) and ACTA1-Cre (FVB.Cg-Tg(ACTA1-cre)79Jme/J) mice were procured from the Jackson Laboratories, USA. C57BL/6-SIRT6 mice was previously generated and C57BL/6 myogenin-cre mice was a gift from P. Puigserver.                                                                                                                                                                                                                                                                            |
| Wild animals            | Not used                                                                                                                                                                                                                                                                                                                                                                                                                                                                                                                                              |
| Field-collected samples | Not used                                                                                                                                                                                                                                                                                                                                                                                                                                                                                                                                              |
| Ethics oversight        | Animal handling protocols were reviewed and duly approved by the Institutional Animal Ethics Committee (IAEC) of the Indian Institute of Science, constituted as per article number 13 of the Committee for the Purpose of Control and Supervision of Experiments on Animals (CPCSEA), Government of India. All the studies conformed with the Guide for the Care and Use of Laboratory Animals published by the US National Institute of Health (NIH Publication No. 85-23, revised 1996).<br>The approved protocols are included in the manuscript. |

Note that full information on the approval of the study protocol must also be provided in the manuscript.
