# Supplementary material for: Sirtuin 6 inhibition protects against glucocorticoid-induced skeletal muscle atrophy by regulating IGF/PI3K/AKT signaling
Source: PubMed Central journal article supplement (PMC9478160; doi:10.1038/s41467-022-32905-w), 2022-09-15
Supplement: 41467_2022_32905_MOESM4_ESM.pdf [file 41467_2022_32905_MOESM4_ESM.pdf]

**Title: Supplementary Data 1:**

**Description:** Statistical test details including ANOVA table analysis and p-value, and n value for each panel

**Title: Supplementary Data 2:**

**Description:** Details of primers, siRNAs, plasmids, adenovirus, kits, chemicals, reagents, equipments used in the study
